# Supplementary material for: A solvent-resistant azide-based hole injection/transporting conjugated polymer for fluorescent and phosphorescent light-emitting diodes
Source: Royal Society of Chemistry journal article supplement (doi:10.1039/c5tc01794g), 2015-01-01
Supplement: c5tc01794g1.pdf [file c5tc01794g1.pdf]

## Supporting Information for

# Solvent-Resistant Azide-Based Hole Injection/Transporting Conjugated Polymer for Fluorescent and Phosphorescent Light- Emitting Diodes

**Cheng-Wei Huang<sup>a</sup>, Feng-Chih Chang<sup>a,b</sup>, Yu-Lin Chu<sup>a</sup>, Cheng-Chang Lai<sup>c</sup>, Tzu-  
En Lin<sup>a</sup>, Chao-Yuan Zhu<sup>a,\*</sup> and Shiao-Wei Kuo<sup>b,\*</sup>**

<sup>a</sup>Institute of Applied Chemistry, National Chiao Tung University, Hsinchu, 30010 Taiwan

<sup>b</sup>Department of Materials and Optoelectronic Science, National Sun Yat-Sen University, Kaohsiung,  
804, Taiwan

<sup>c</sup>Department of Chemistry, National Tsing Hua University, Hsinchu, 30013, Taiwan.

\*To whom correspondence should be addressed

E-mail: cyzhu@mail.nctu.edu.tw and kuosw@faculty.nsysu.edu.tw

## Experimental Section

### 4-Butyl-*N,N*-bis(4-bromophenyl)aniline (1)

4-Butylaniline (4.00 g, 26.8 mmol), 1-bromo-4-iodobenzene (16.7 g, 59.0 mmol), KOH (13.7 g, 243 mmol), 1,10-phenanthroline (0.176 g, 0.970 mmol), CuCl (0.100 g, 0.950 mmol), and toluene (50 mL) were added sequentially to a two-neck reaction flask equipped with a condenser. The contents of the reaction vessel were heated under reflux for 30 min and then kept stirring for 12 h under a N<sub>2</sub> atmosphere. The reaction mixture was filtered then extracted with toluene (100 mL) and brine (100 mL). The organic phase was dried (MgSO<sub>4</sub>), filtered, and concentrated under vacuum. The residue was subjected to column chromatography (SiO<sub>2</sub>; hexane) to give a colorless wax (7.9 g, 64 %). <sup>1</sup>H NMR (Figure S1, CDCl<sub>3</sub>, δ): 7.30 (dd, 4H; ArH), 7.07 (d, 2H; ArH), 6.96 (d, 2H; ArH), 6.90 (dd, 4H; ArH), 2.56 (t, 2H; CH<sub>2</sub>), 1.63–1.52 (m, 2H; CH<sub>2</sub>), 1.41–1.29 (m, 2H; CH<sub>2</sub>), 0.93 (t, 3H; CH<sub>3</sub>).

### 4-Butyl-*N,N*-bis(4,4,5,5-tetramethyl-1,3,2-dioxaborolane-4-phenyl)aniline (2)

*n*-Butyllithium (2.5 M in hexane; 6.59 mL, 16.5 mmol) was added to a solution of 4-butyl-*N,N*-bis(4-bromophenyl)aniline (1; 3.00 g, 6.53 mmol) in anhydrous THF (65 mL) at –78 °C and then the mixture was stirred at that temperature for 45 min. The solvent was evaporated in vacuo and then the residue was taken up into CHCl<sub>3</sub> and washed with brine. The organic phase was dried (MgSO<sub>4</sub>) and concentrated; the residue was recrystallized from MeOH to give colorless crystals (2.3 g, 77%) <sup>1</sup>H NMR (Figure S1, CDCl<sub>3</sub>, δ): 7.64 (d, 4H; ArH), 7.03 (m, 8H; ArH), 2.56 (t, 2H; CH<sub>2</sub>), 1.63–1.53 (m, 2H; CH<sub>2</sub>), 1.38–1.31 (m, 26H; CH<sub>2</sub> and C<sub>8</sub>H<sub>24</sub>), 0.92 (t, 3H; CH<sub>3</sub>). <sup>13</sup>C NMR (125 MHz, CDCl<sub>3</sub>, δ):

150.5, 145.2, 139.6, 136.5, 130.1, 126.5, 122.9, 84.1, 35.3, 33.8, 24.9, 22.5, 14.0.

#### **6-Bromobutyl-9(3,6-carbazole) (4)**

3,6-Dibromo-9*H*-carbazole (3.50 g, 10.7 mmol), powdered anhydrous K<sub>2</sub>CO<sub>3</sub> (2.98 g, 21.5 mmol), 1,6-dibromohexane (26.3 g, 0.107 mol), and dry MeCN (45 mL) were placed in a condenser-equipped reaction flask and then stirred with heating at 95 °C for 36 h. After cooling to room temperature, the mixture was filtered and the solvent evaporated. The residue was recrystallized from petroleum ether to give colorless crystals (3.9 g, 75%). <sup>1</sup>H NMR (Figure S3, CDCl<sub>3</sub>, δ): 8.10 (d, 2H; ArH), 7.54 (dd, 2H; ArH), 7.25 (d, 2H; ArH), 4.25 (t, 2H; CH<sub>2</sub>), 3.35 (t, 2H; CH<sub>2</sub>), 1.90–1.75 (m, 4H; CH<sub>2</sub>), 1.51–1.28 (m, 4H; CH<sub>2</sub>).

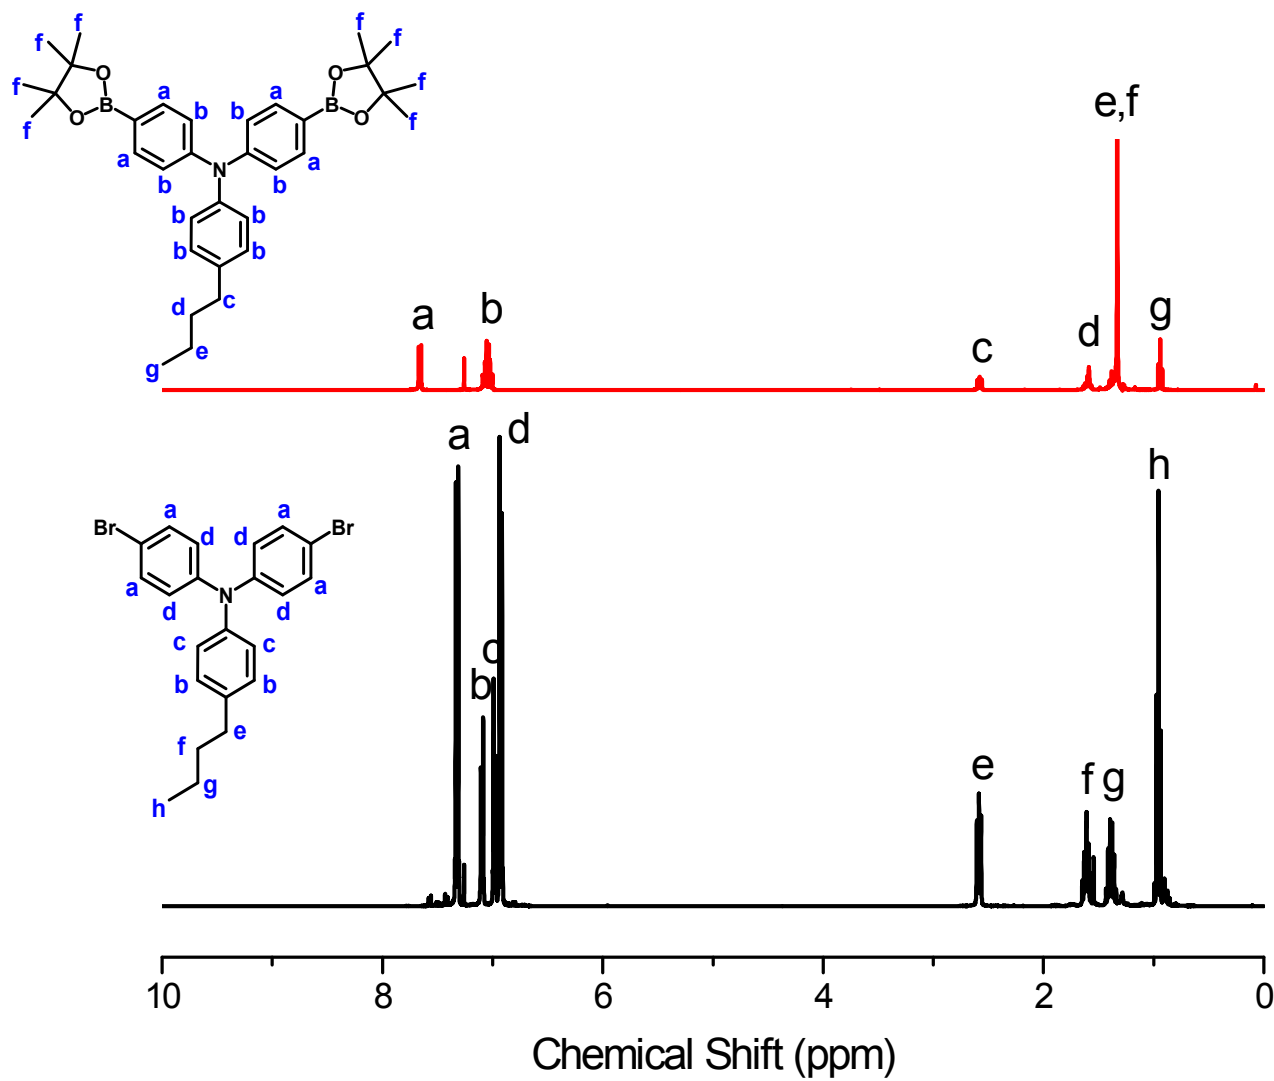

Figure S1: <sup>1</sup>H NMR spectra of the monomers 1 and 2.

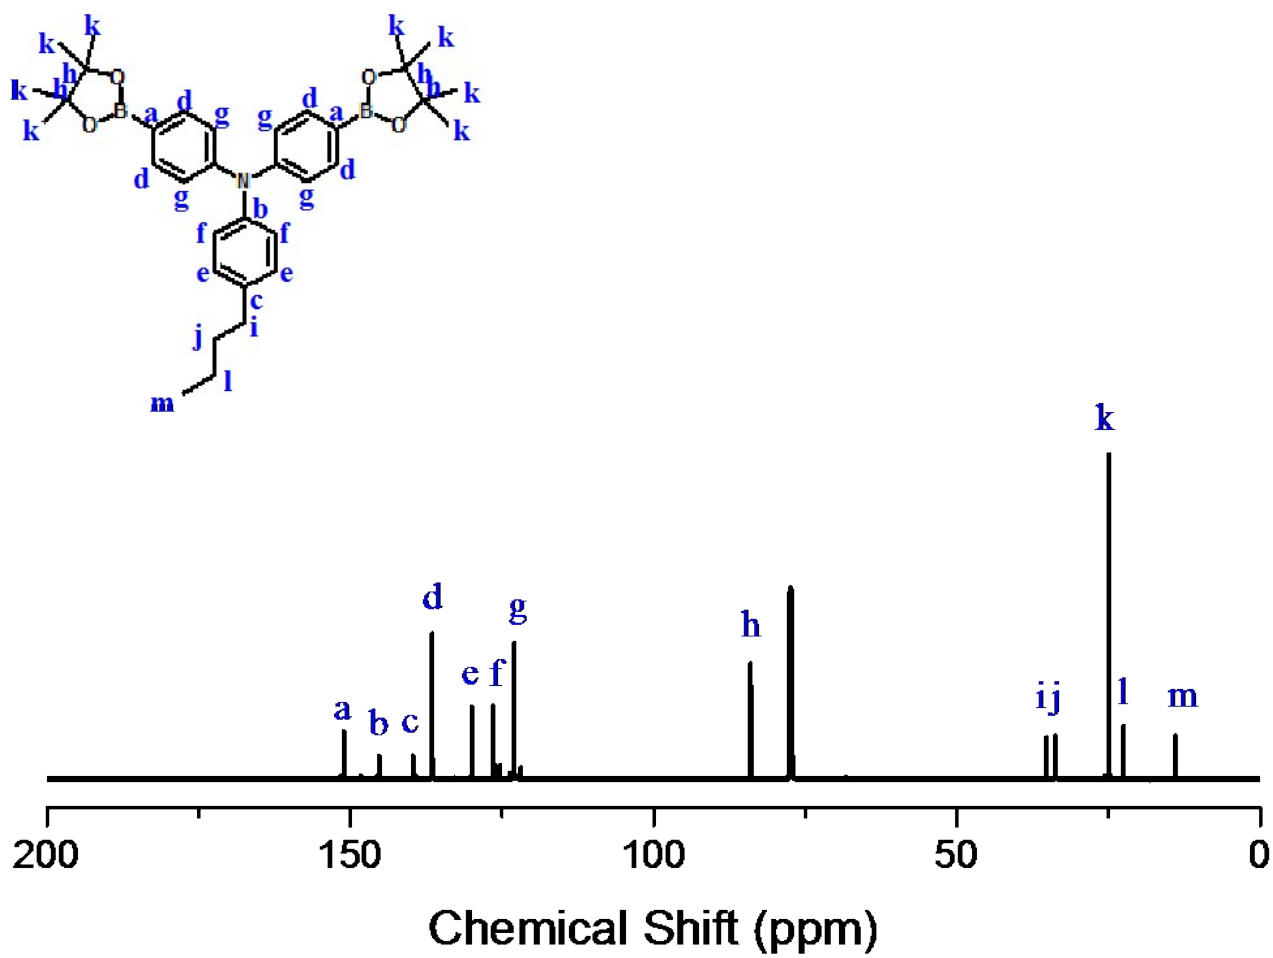

Figure S2: <sup>13</sup>C NMR spectrum of the monomer 2.

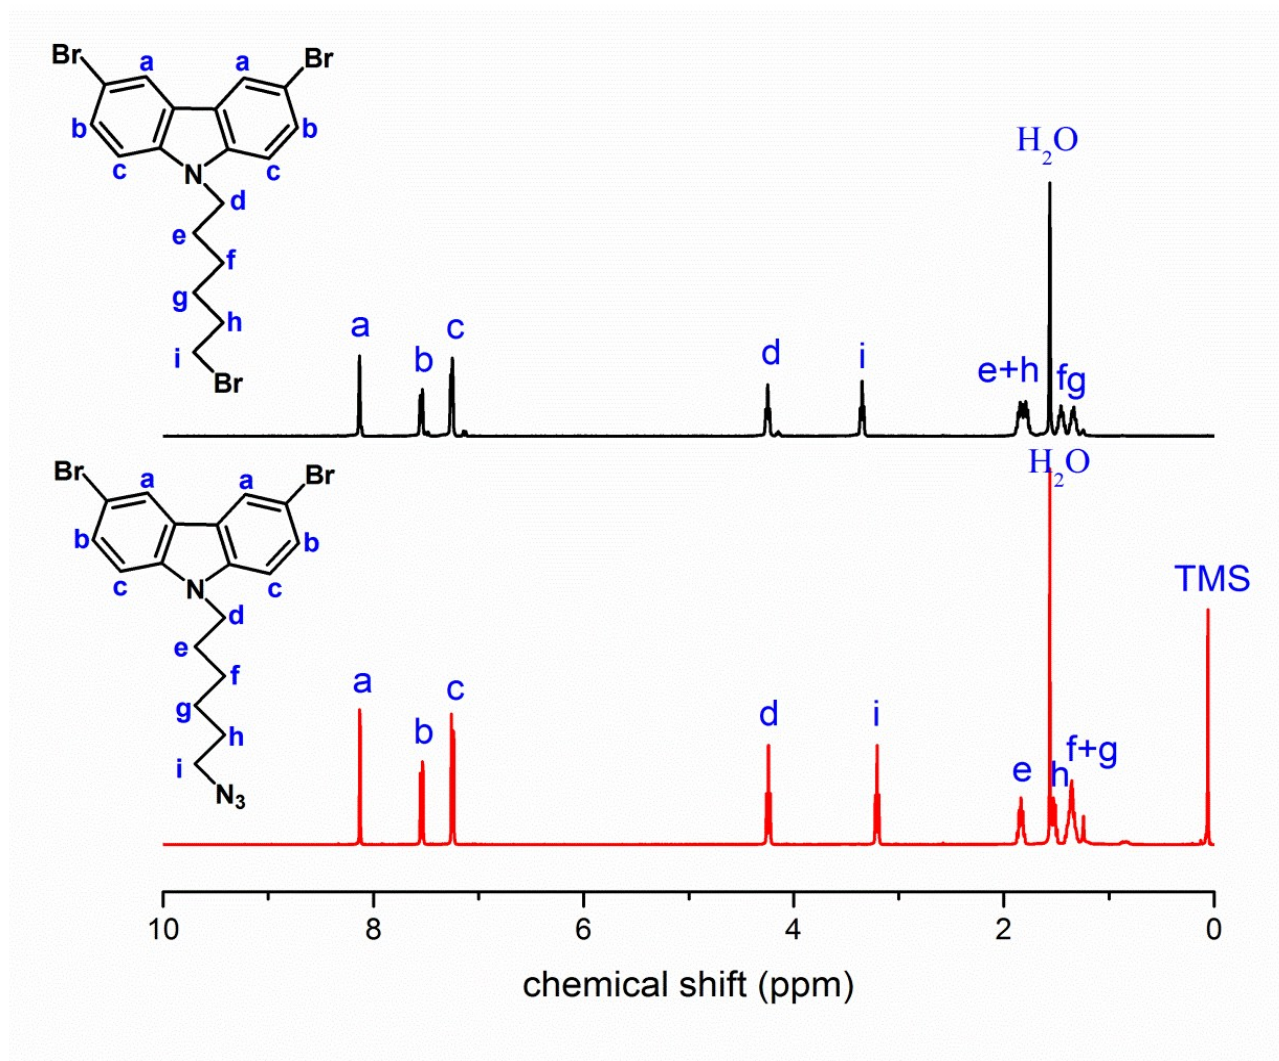

Figure S3: <sup>1</sup>H NMR spectra of the monomers 4 and 5.

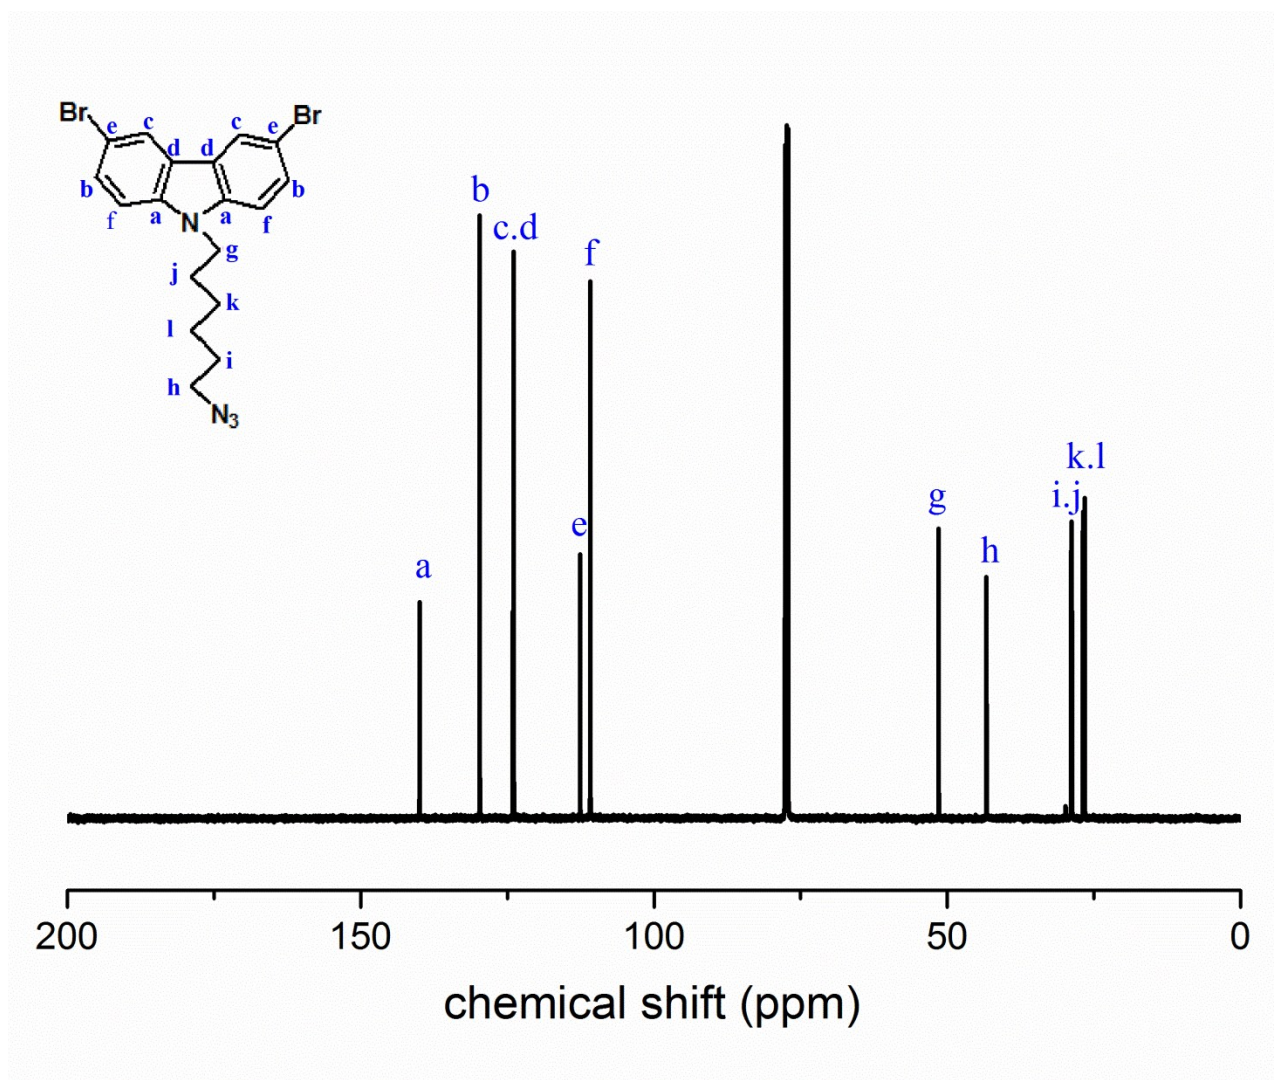

Figure S4:  $^{13}\text{C}$  NMR spectrum of the monomer 5.

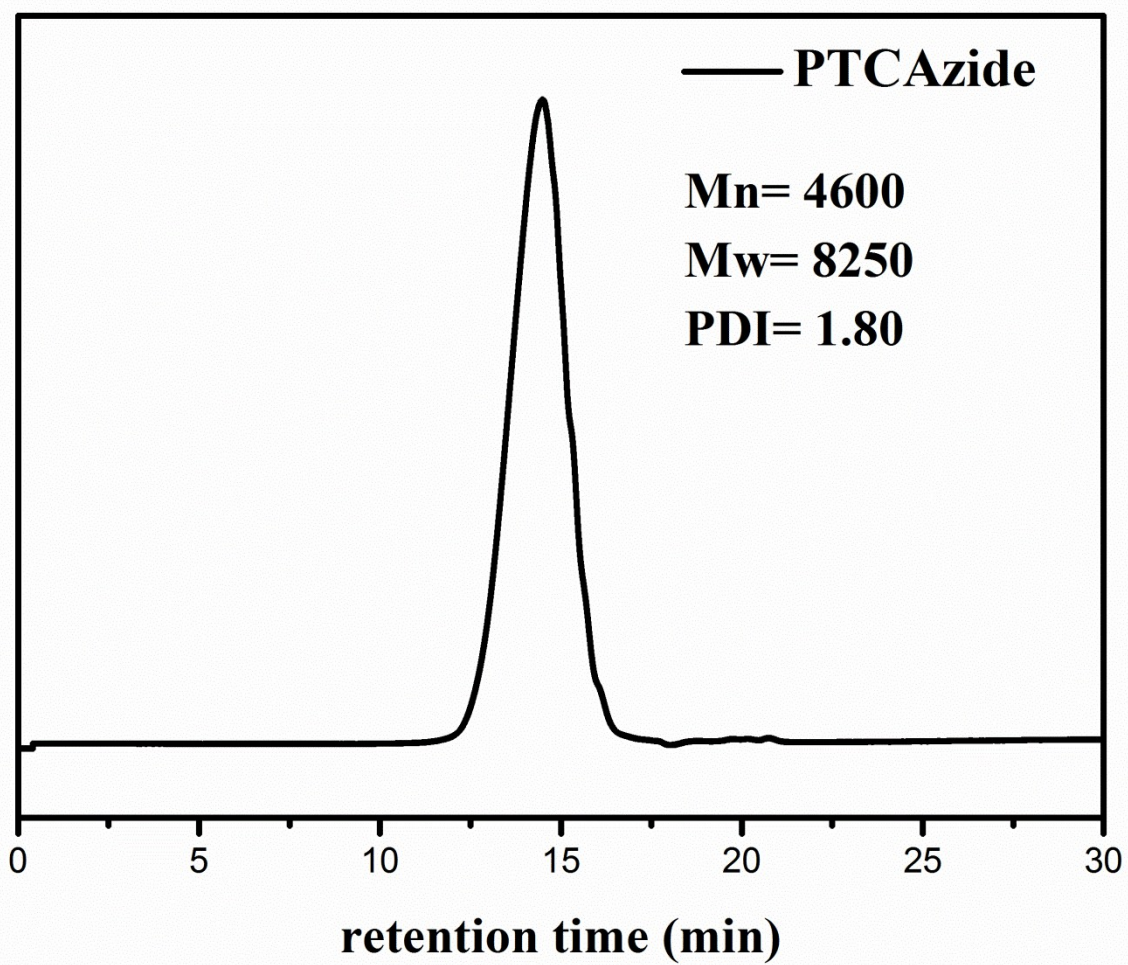

Figure S5: GPC trace of the copolymer PTCAzide.



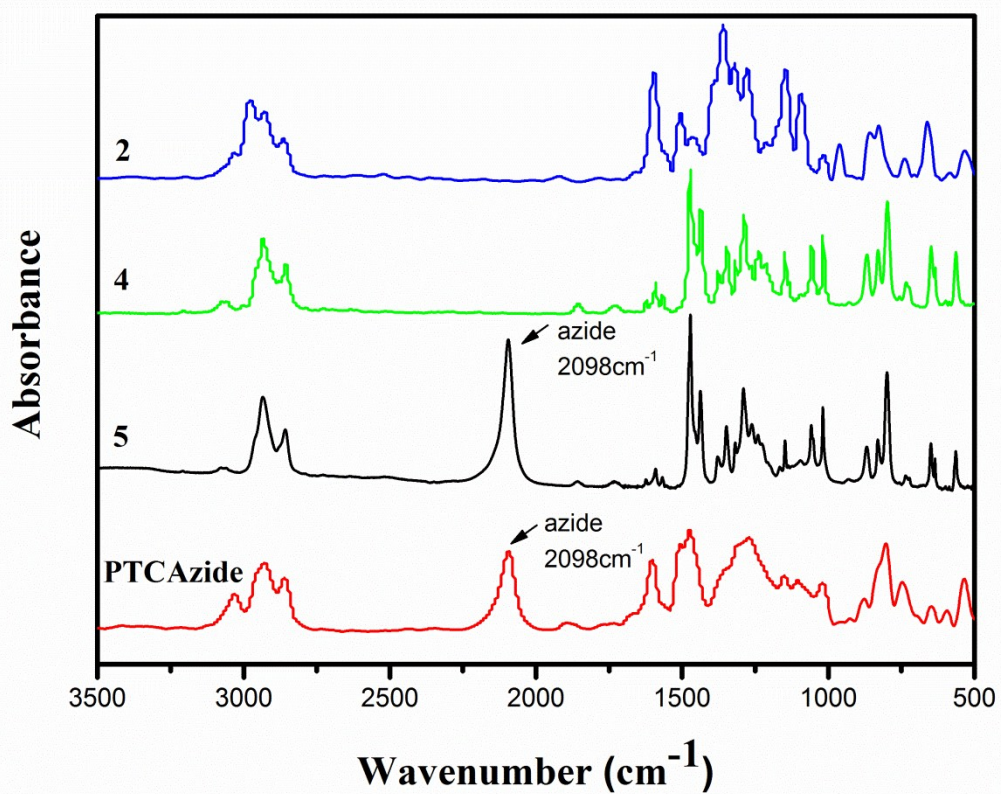

Figure S6: FTIR spectra of the copolymer PTCAzide and the corresponding monomers used in this study.

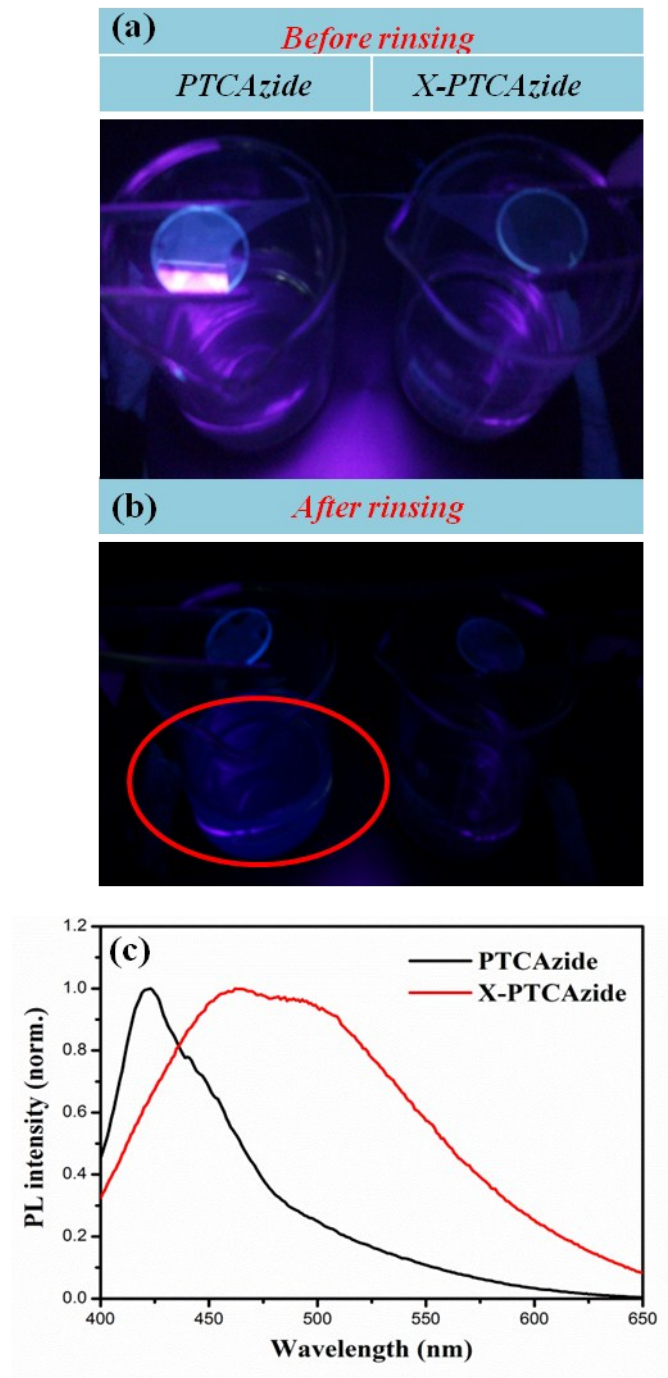

Figure S7: Image for polymer thin film (a) before and (b) after chlorobenzene rinsing (Left: PTCAzide, Right: X-PTCAzide). PL spectra of PTCAzide and X-PTCAzide has been in (c) in normalized scale.

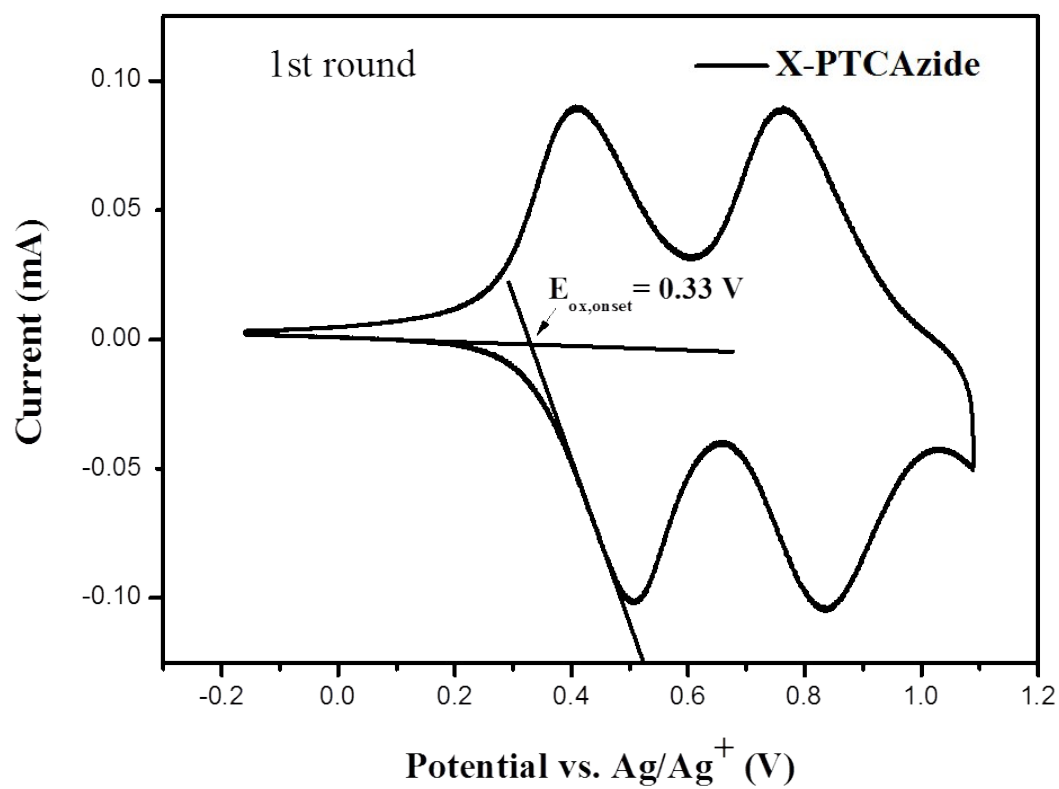

Figure S8: First-round cyclic voltammogram of X-PTCAzide.

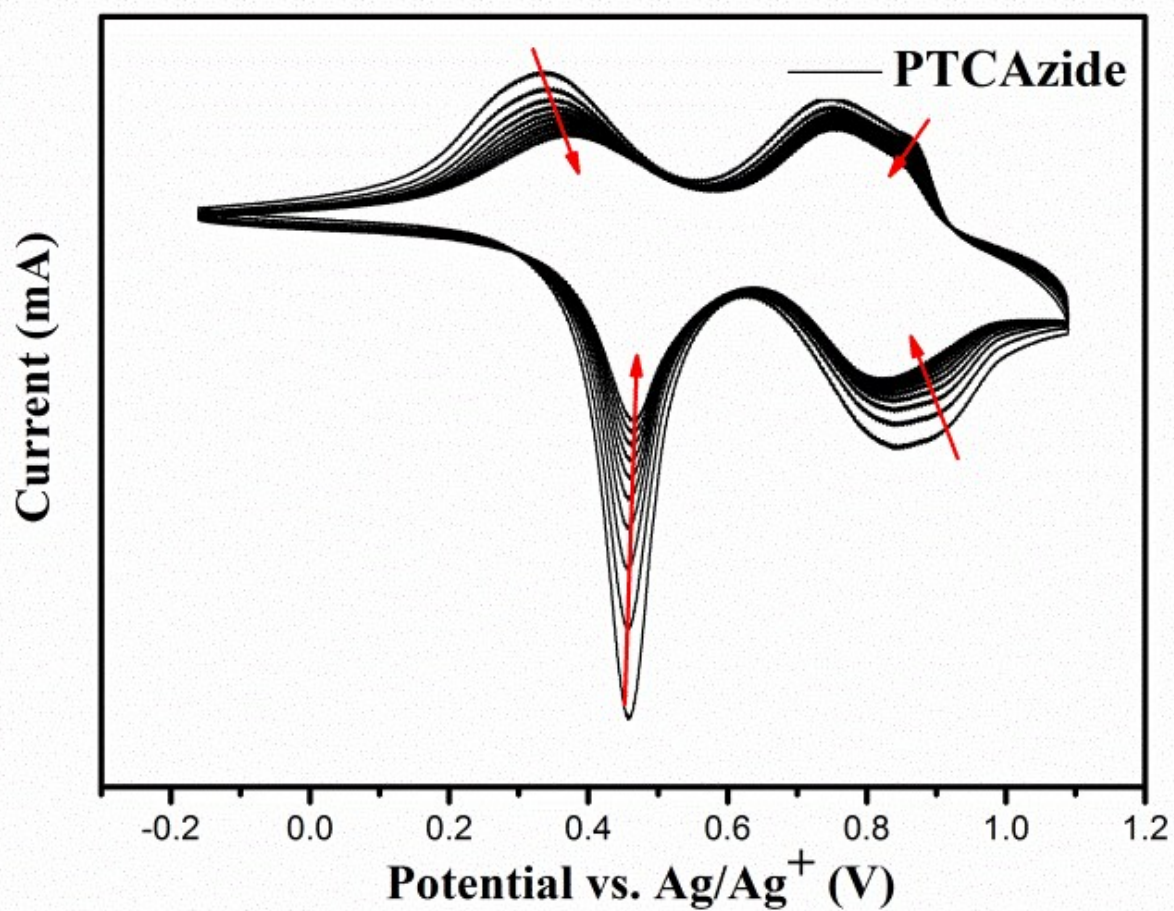

Figure S9: 10 cycle Cyclic voltammograms of PTCAzide on ITO substrates at a scan rate of 100 mV s<sup>-1</sup>.

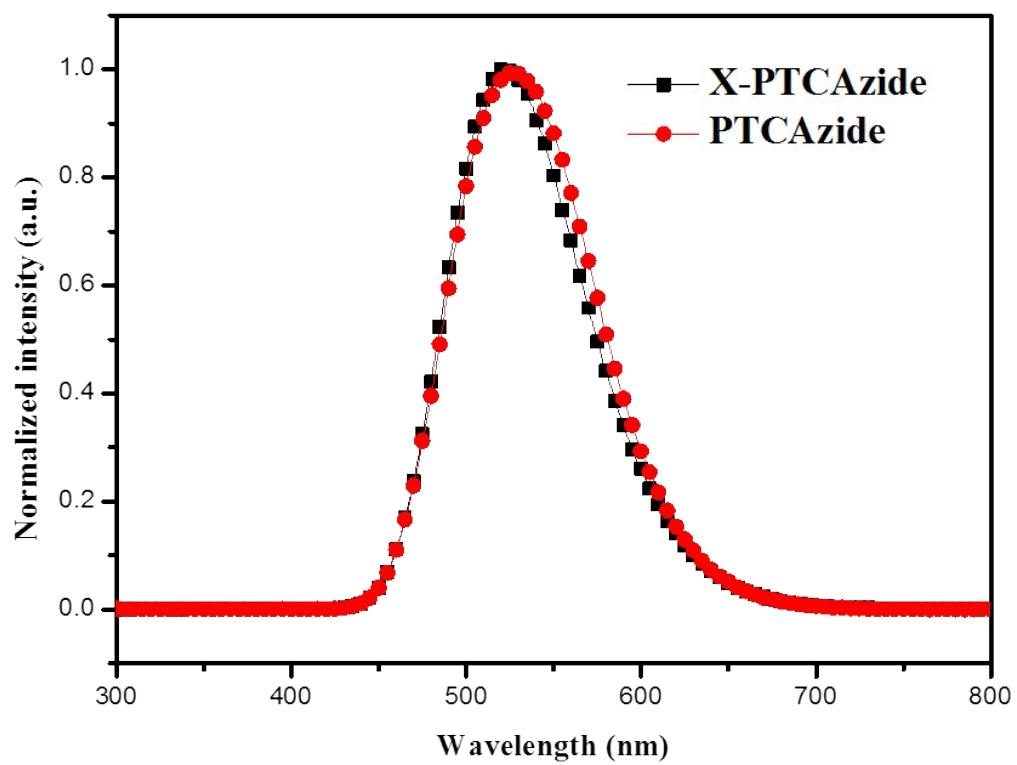

Figure S10: Electroluminescence from devices having the structure ITO/HITL/NPB/Alq<sub>3</sub>/LiF/Al.

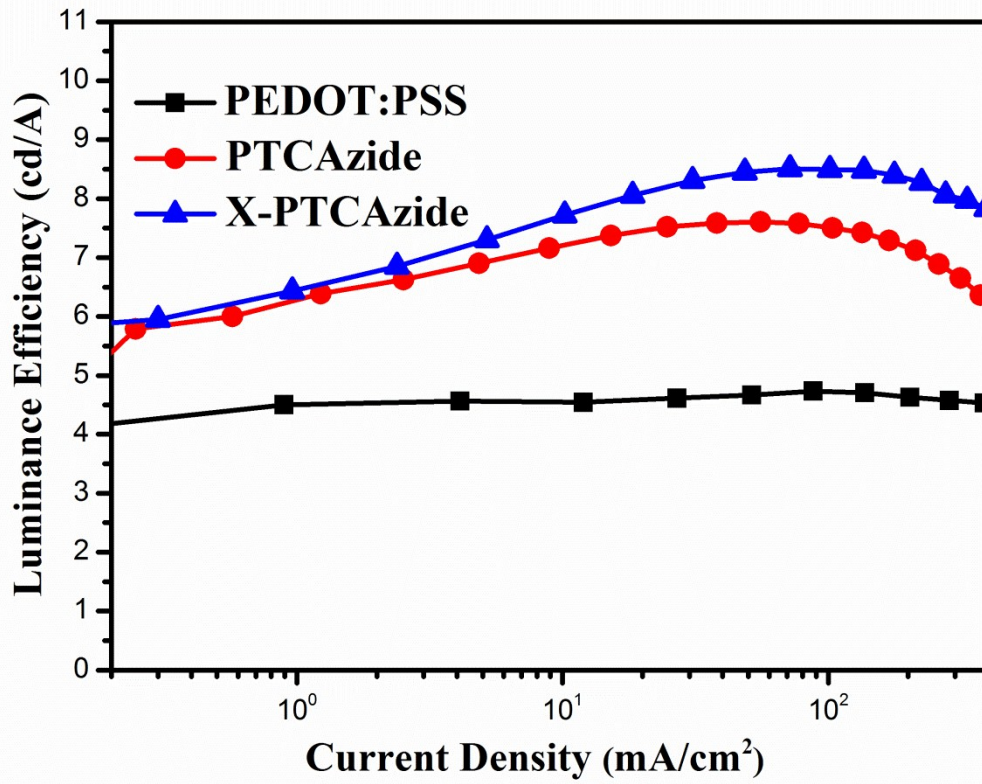

Figure S11: LE-J of device characteristic with structure ITO/HITL/NPB/Alq<sub>3</sub>/LiF/Al.

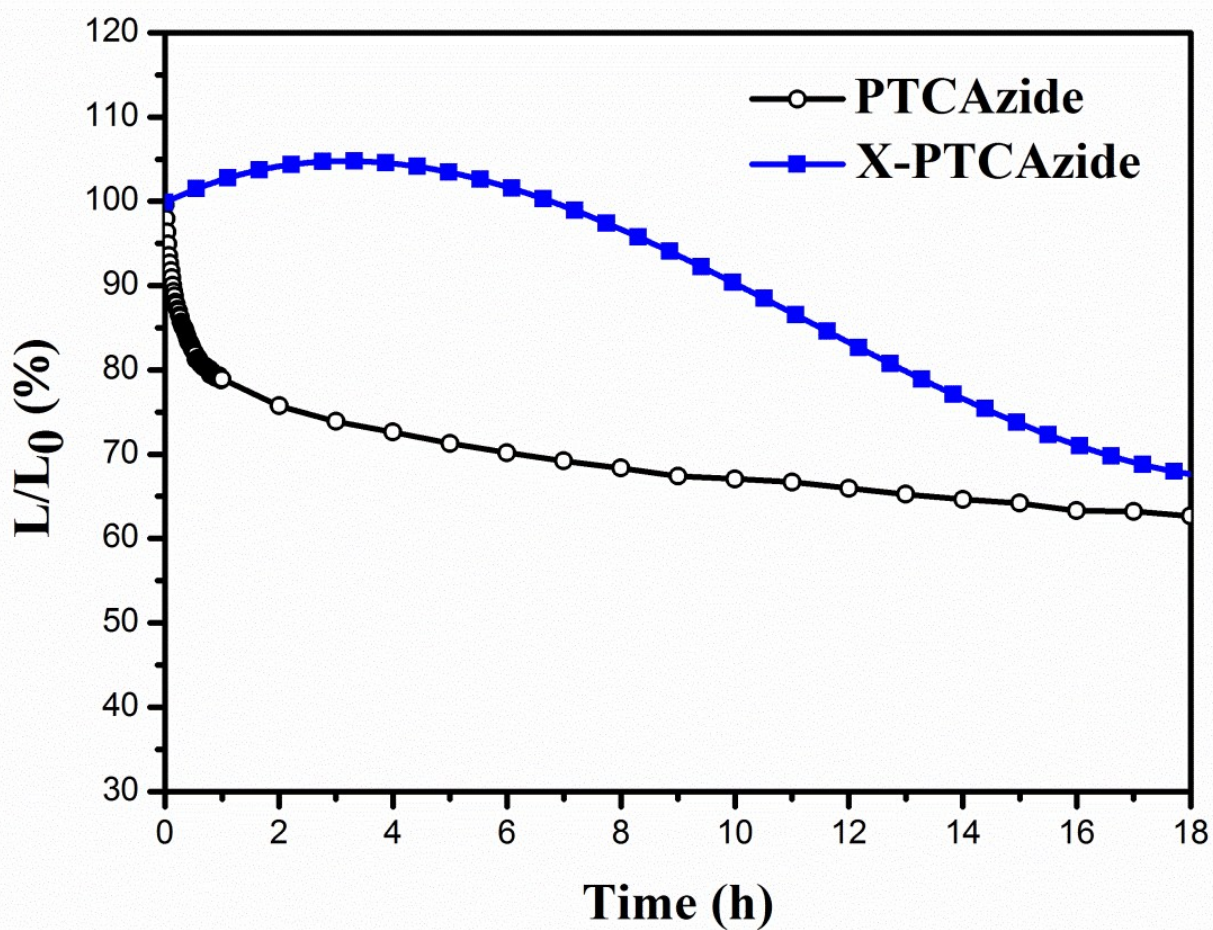

Figure S12: Comparison of device operational stability of ITO/HITL/NPB/Alq<sub>3</sub>/LiF/Al device at a constant operating current density of 13.6 mA cm<sup>-2</sup> for PTCAzide device, 12.7 mA cm<sup>-2</sup> for X-PTCAzide device. The initial brightness was 1000 cd m<sup>-2</sup> for both devices. The measurement was conducted under a nitrogen atmosphere in a glove box.

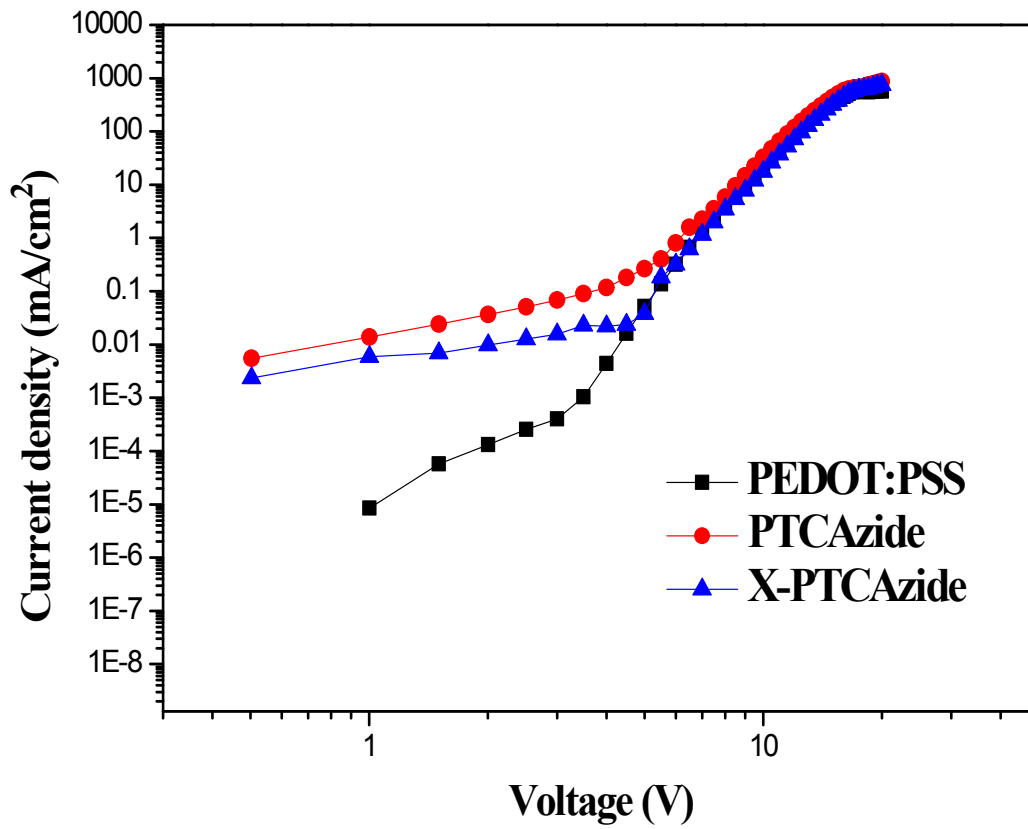

Figure S13: Leakage current of devices having the structure ITO/HITL/Ir(ppy)<sub>3</sub>:PVK/BCP/Alq<sub>3</sub>/LiF/Al.
